# Supplementary material
Source: PubMed Central journal article supplement (PMC321759)

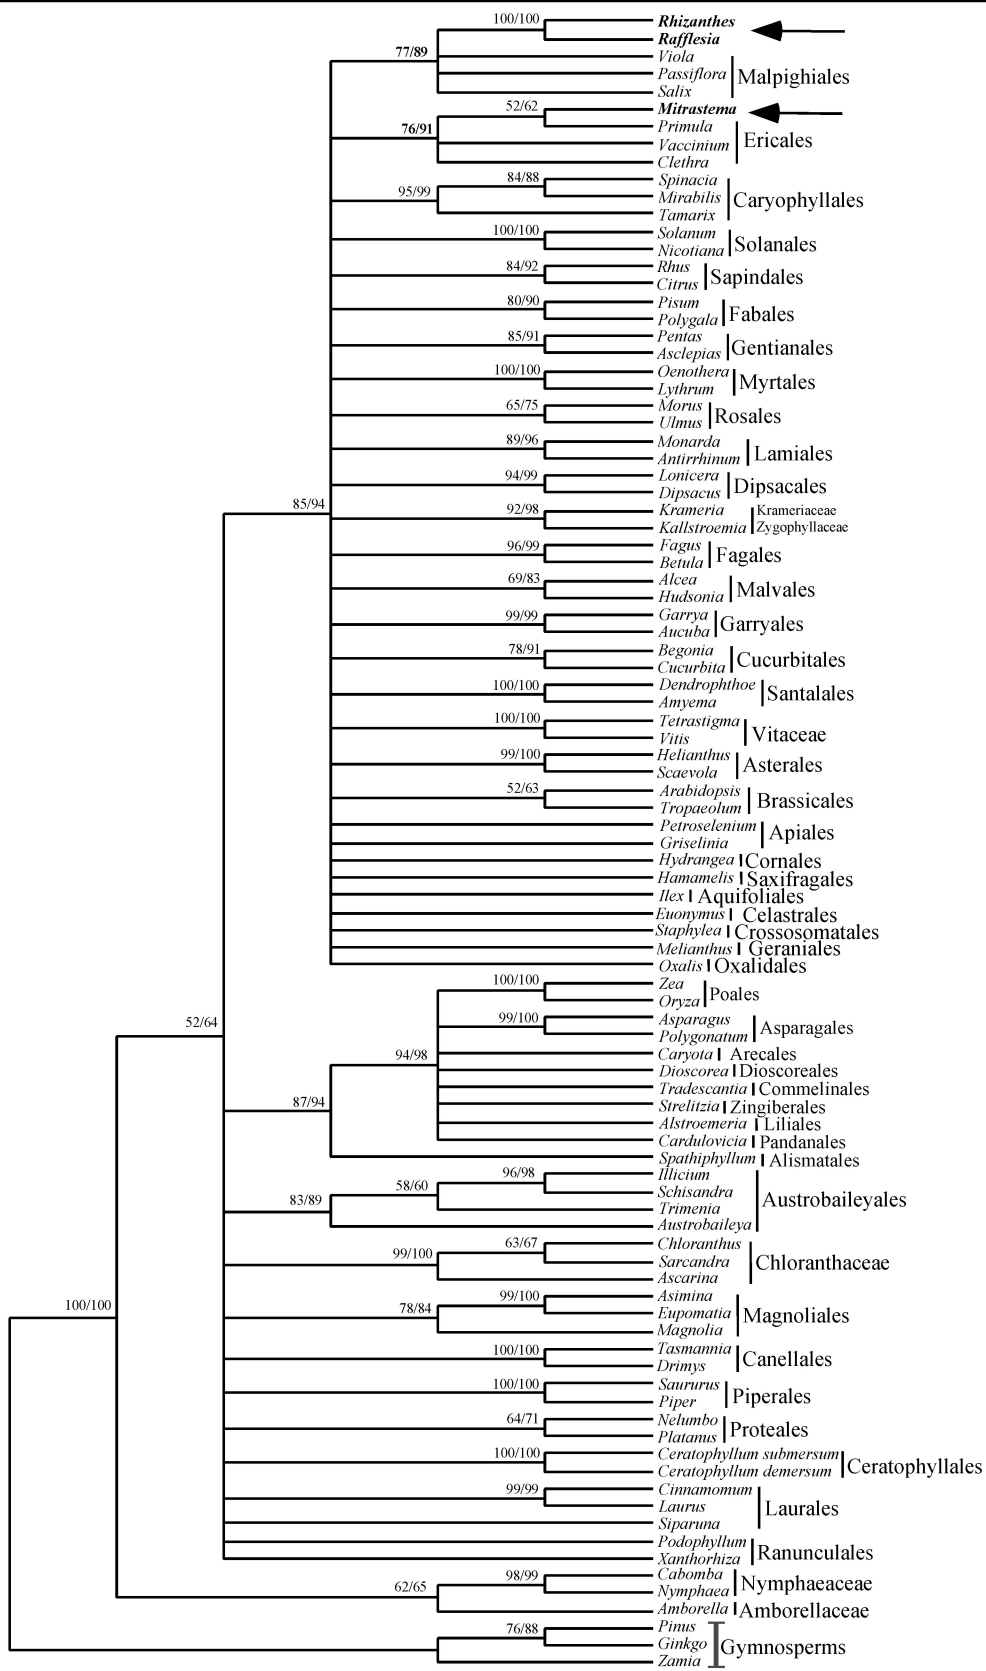

Supplement: pnas_0305562101_10.pdf [file pnas_0305562101_10.pdf]

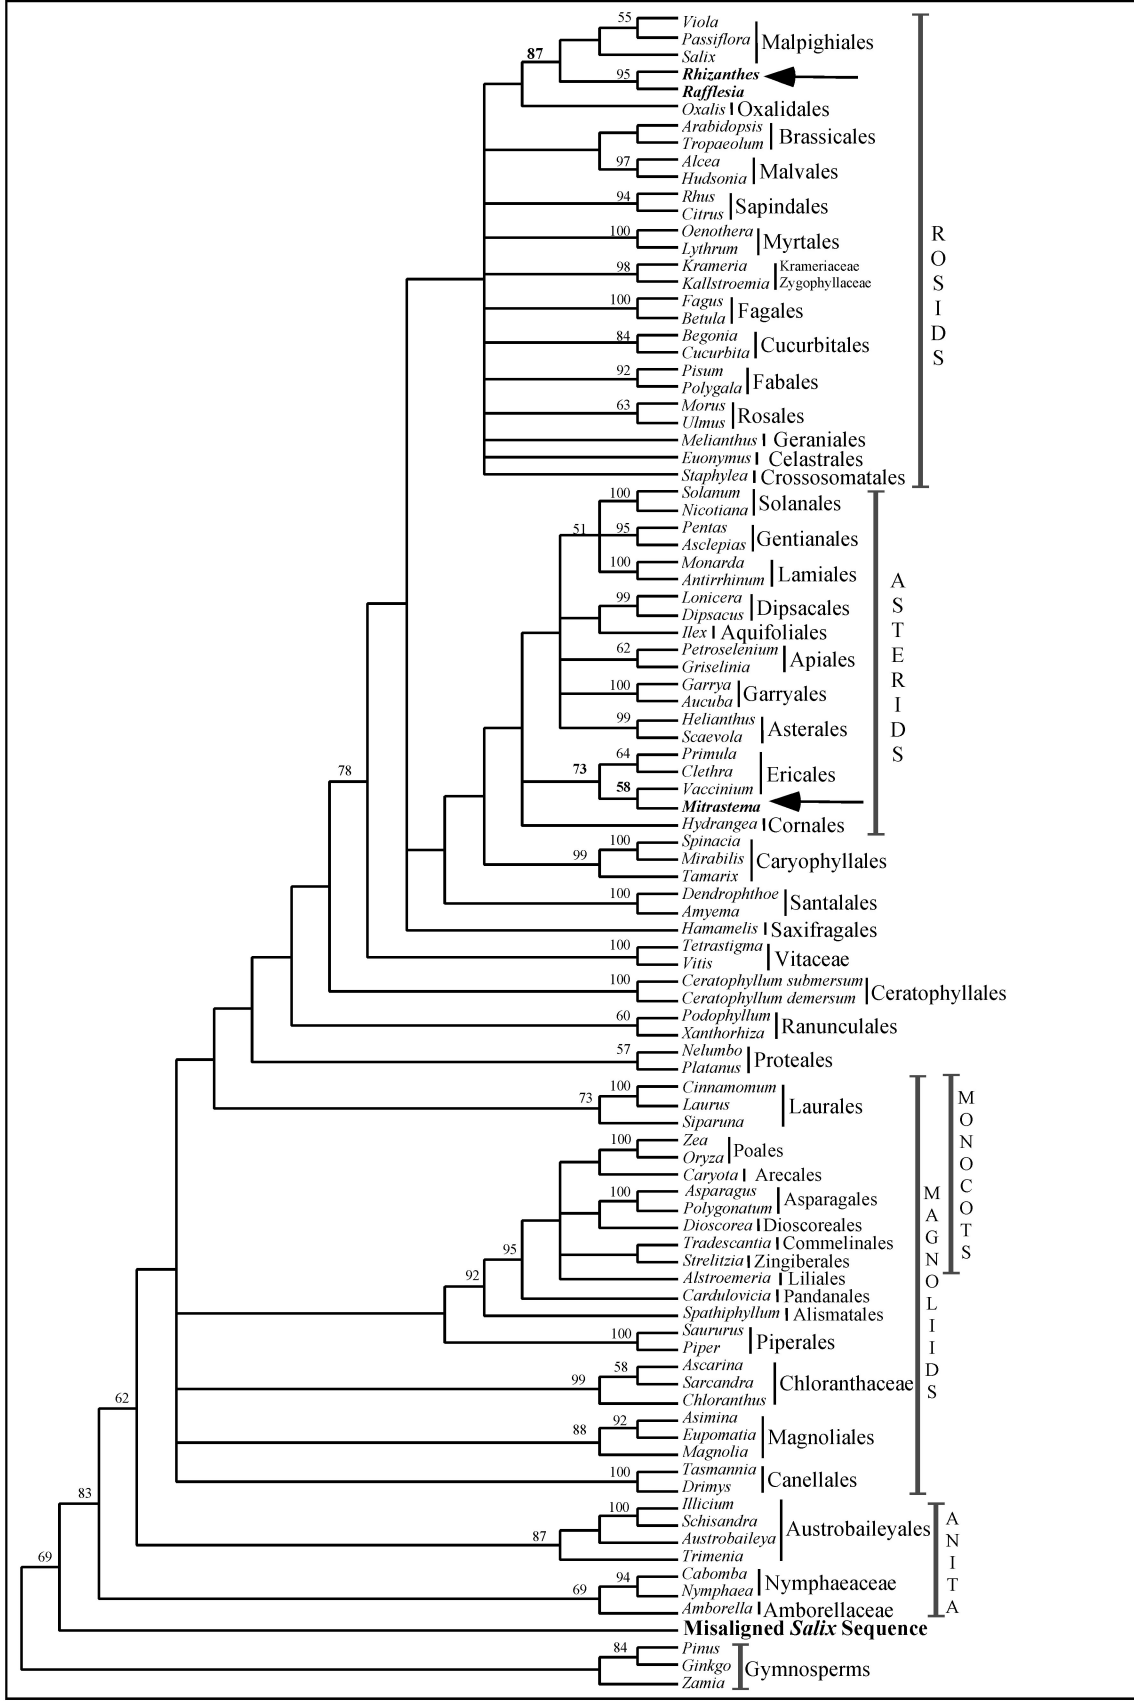

Supplement: pnas_0305562101_14.pdf [file pnas_0305562101_14.pdf]

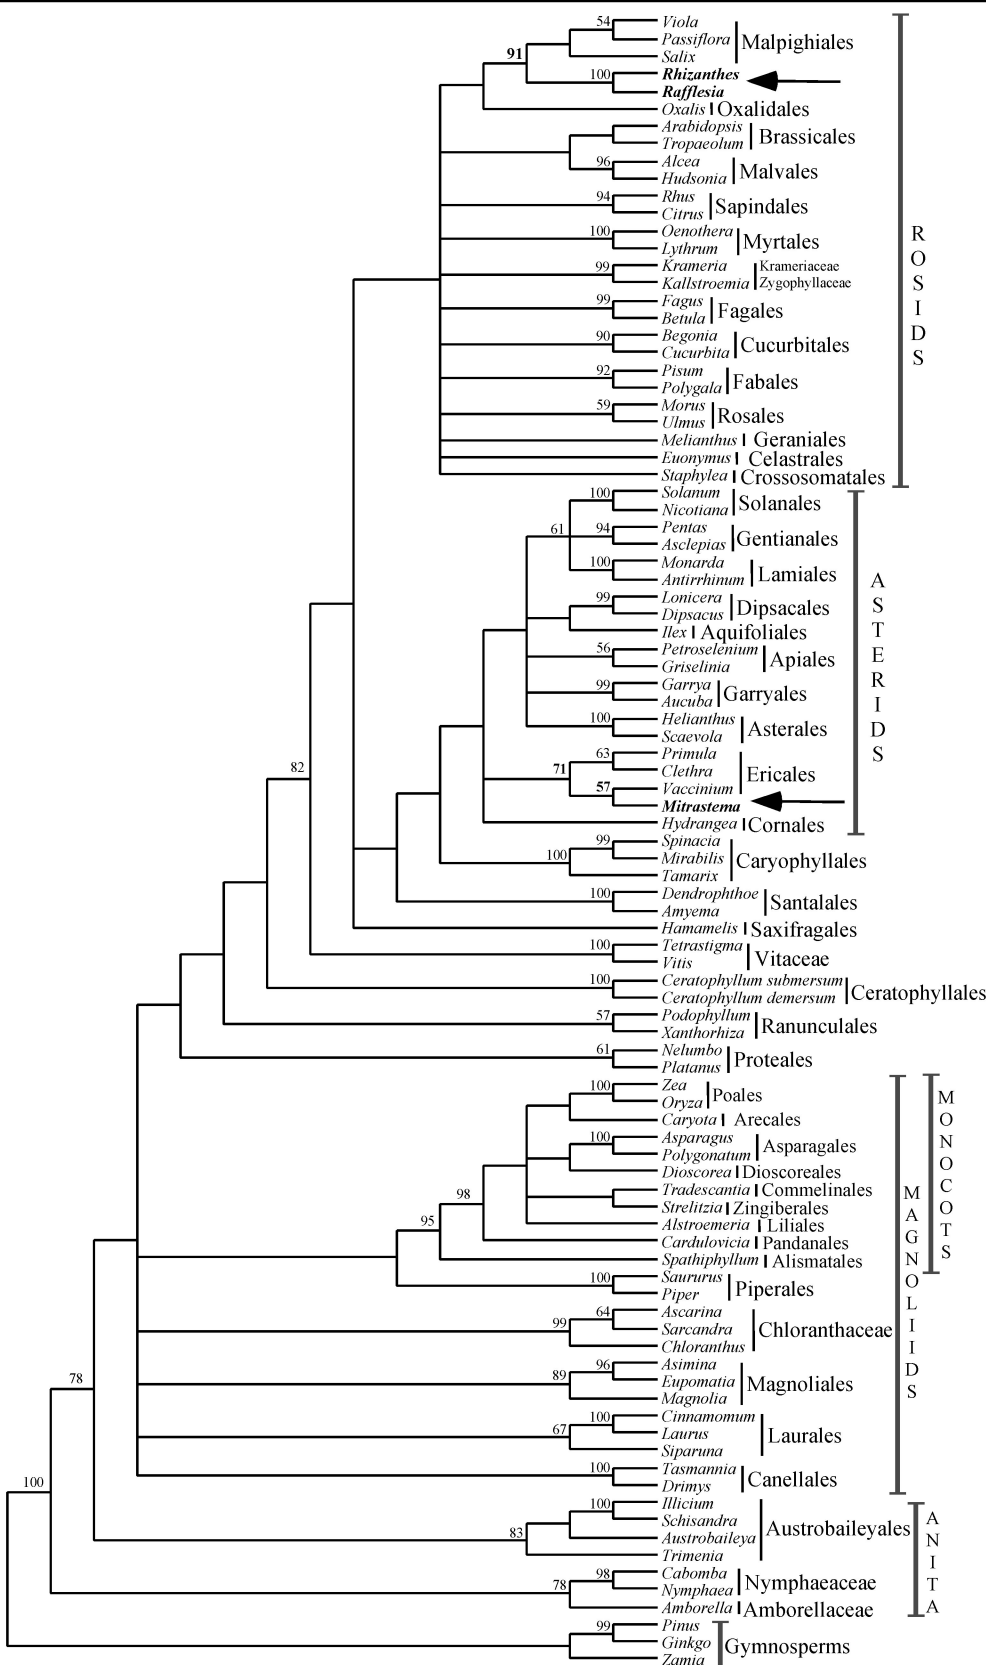

Supplement: pnas_0305562101_16.pdf [file pnas_0305562101_16.pdf]

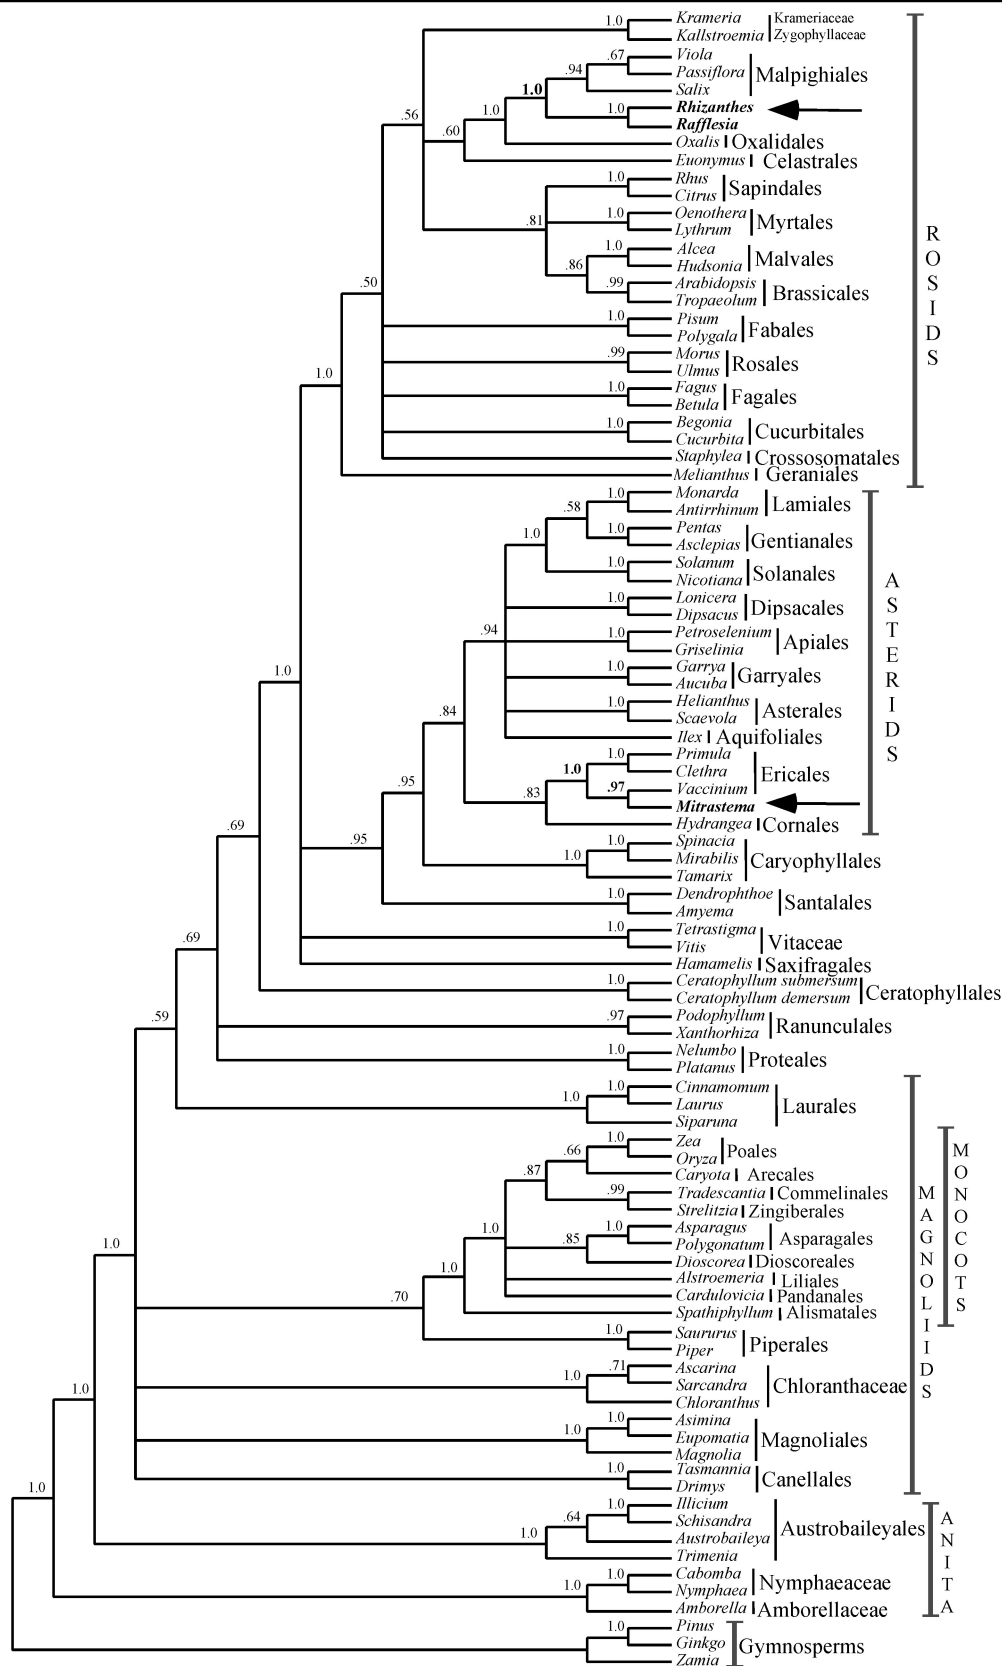

Supplement: pnas_0305562101_4.pdf [file pnas_0305562101_4.pdf]

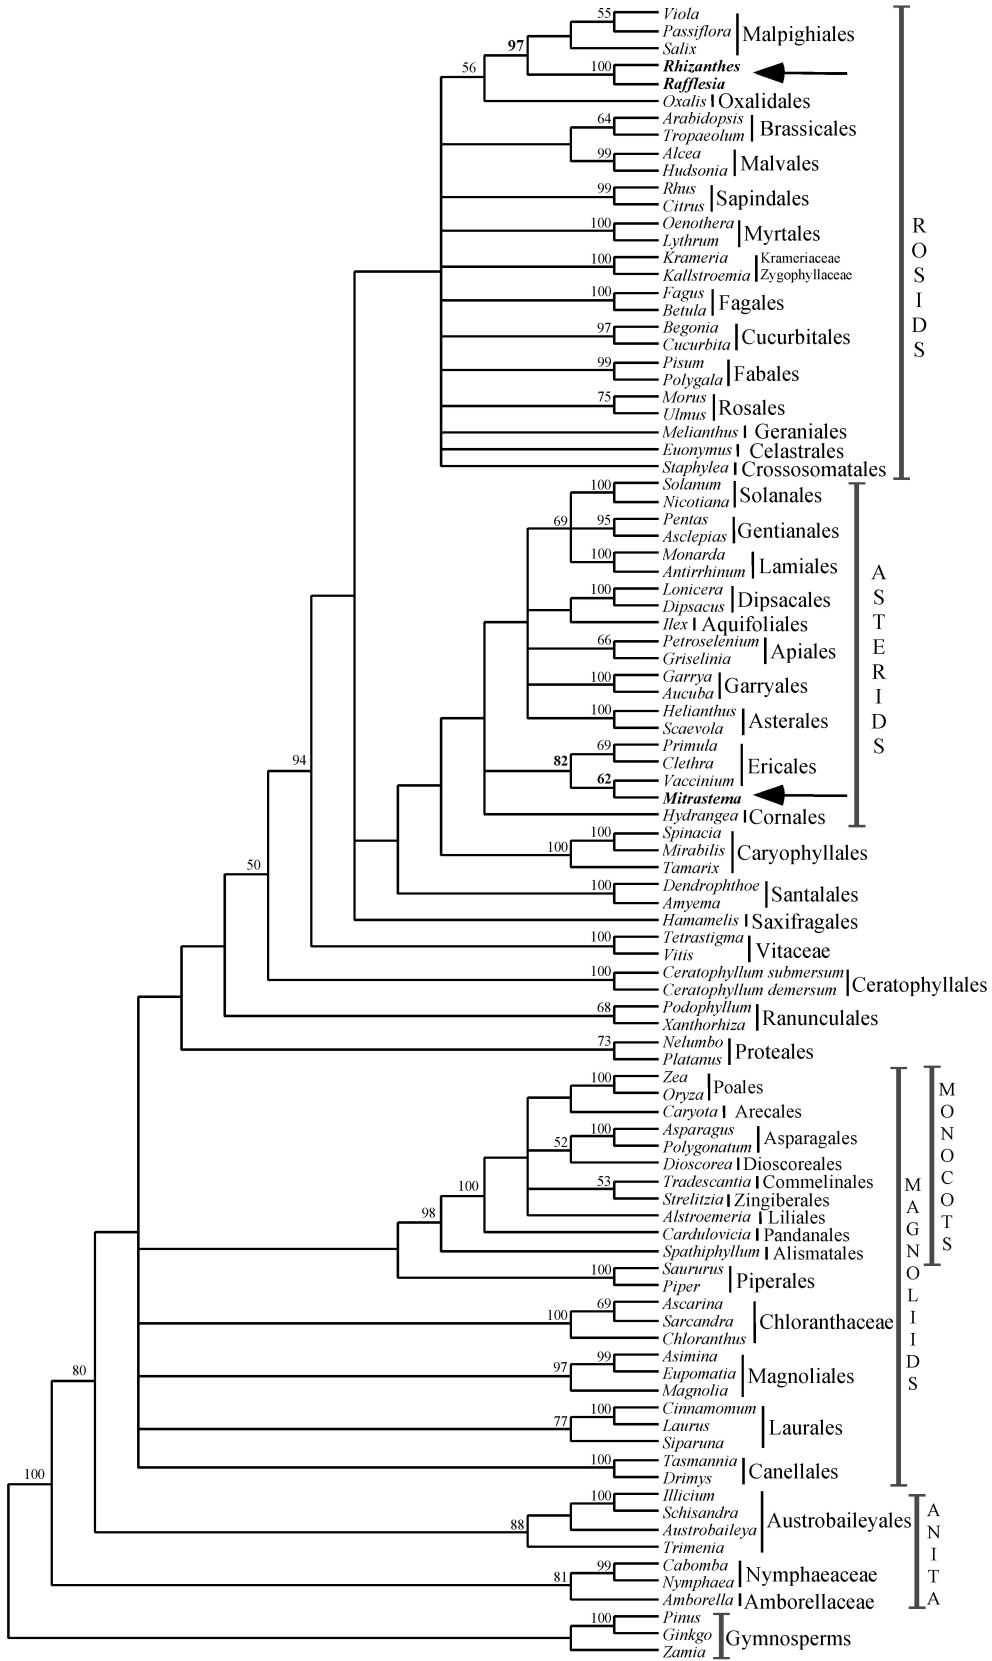

Supplement: pnas_0305562101_6.pdf [file pnas_0305562101_6.pdf]
